# Supplementary material
Source: Royal Society of Chemistry journal article supplement (doi:10.1039/d6tc00069j)
Supplement: d6tc00069j1.pdf [file d6tc00069j1.pdf]

## First-Principles Study on Magnetic MXenes for Free Radicals

### Trapping and Sensing

**Table S1** Formation energies of proposed MXenes

| MXenes                    | $E_f(\text{eV/f.u.})$ | MXenes                    | $E_f(\text{eV/f.u.})$ |
|---------------------------|-----------------------|---------------------------|-----------------------|
| $\text{Fe}_2\text{CO}_2$  | -1.57                 | $\text{Co}_2\text{CO}_2$  | -0.14                 |
| $\text{Fe}_2\text{CF}_2$  | -4.40                 | $\text{Co}_2\text{CF}_2$  | -3.47                 |
| $\text{Fe}_2\text{CCl}_2$ | -0.92                 | $\text{Co}_2\text{CCl}_2$ | -0.19                 |
| $\text{Fe}_2\text{CBr}_2$ | 0.02                  | $\text{Co}_2\text{CBr}_2$ | 0.68                  |
| $\text{Ni}_2\text{CO}_2$  | 1.01                  | $\text{Mn}_2\text{CO}_2$  | -3.40                 |
| $\text{Ni}_2\text{CF}_2$  | -3.19                 | $\text{Mn}_2\text{CF}_2$  | -5.66                 |
| $\text{Ni}_2\text{CCl}_2$ | 0.45                  | $\text{Mn}_2\text{CCl}_2$ | -1.88                 |
| $\text{Ni}_2\text{CBr}_2$ | 1.31                  | $\text{Mn}_2\text{CBr}_2$ | -0.80                 |

**Table S2** Effect of supercell size on the minimum radical-radical separation distance, adsorption energy, adsorption bond length and total magnetic moment.

| Supercell Size | Adsorption Coverage | Min. Radical-Radical Distance (Å) | Adsorption Energy (eV) | Adsorption Bond Length (Å) | Magnetic Moment ( $\mu_B$ ) |
|----------------|---------------------|-----------------------------------|------------------------|----------------------------|-----------------------------|
| 2×2×1          | 25.0%               | 5.92                              | -2.01                  | 1.43                       | 2.01                        |
| 3×3×1          | 11.1%               | 8.89                              | -2.51                  | 1.45                       | 2.01                        |
| 4×4×1          | 6.25%               | 11.84                             | -2.94                  | 1.46                       | 2.01                        |

**Table S3** Convergence of SHC for Fe<sub>2</sub>CF<sub>2</sub> as a function of k-mesh density.  $\Delta\text{SHC} = |\text{SHC}_N - \text{SHC}_{N-1}|$  represents the absolute difference between successive k-meshes.

| K-mesh                      | SHC ( $\times 10^4(\hbar/e) \cdot \text{S/m}$ ) | $\Delta\text{SHC}$ ( $\times 10^4(\hbar/e) \cdot \text{S/m}$ ) |
|-----------------------------|-------------------------------------------------|----------------------------------------------------------------|
| 10 $\times$ 10 $\times$ 1   | 19.44                                           | -                                                              |
| 20 $\times$ 20 $\times$ 1   | 14.21                                           | 5.23                                                           |
| 30 $\times$ 30 $\times$ 1   | 20.57                                           | 6.36                                                           |
| 50 $\times$ 50 $\times$ 1   | 8.60                                            | 11.97                                                          |
| 100 $\times$ 100 $\times$ 1 | 9.10                                            | 0.50                                                           |
| 200 $\times$ 200 $\times$ 1 | 9.72                                            | 0.38                                                           |

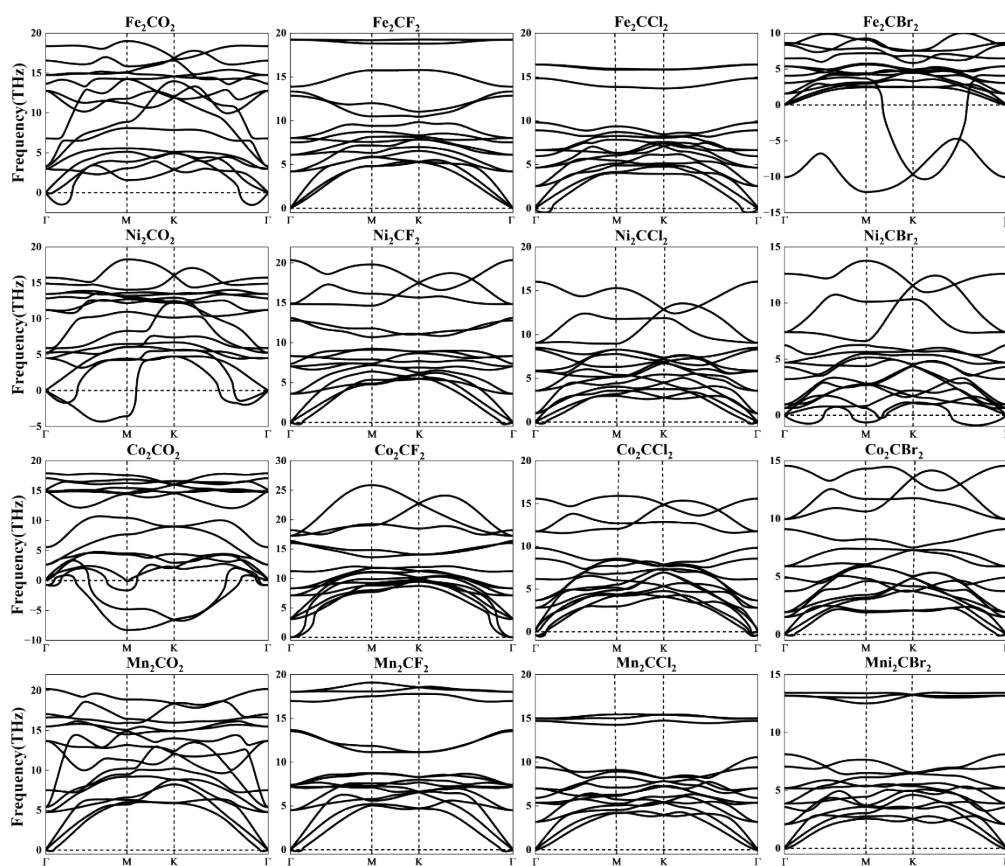

**Figure S1** The phonon spectrums of proposed MXenes.

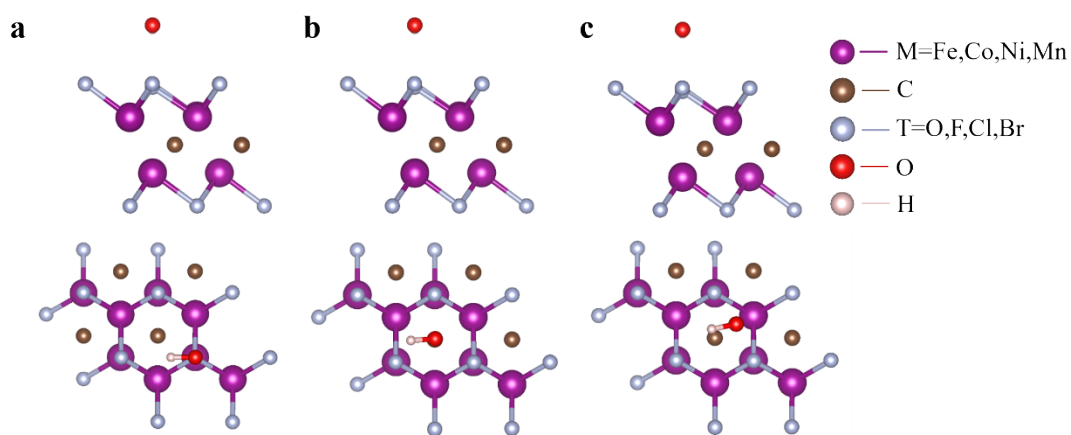

**Figure S2.** Schematic diagram of OH· adsorption: a-Top b-Hollow c-Bridge.

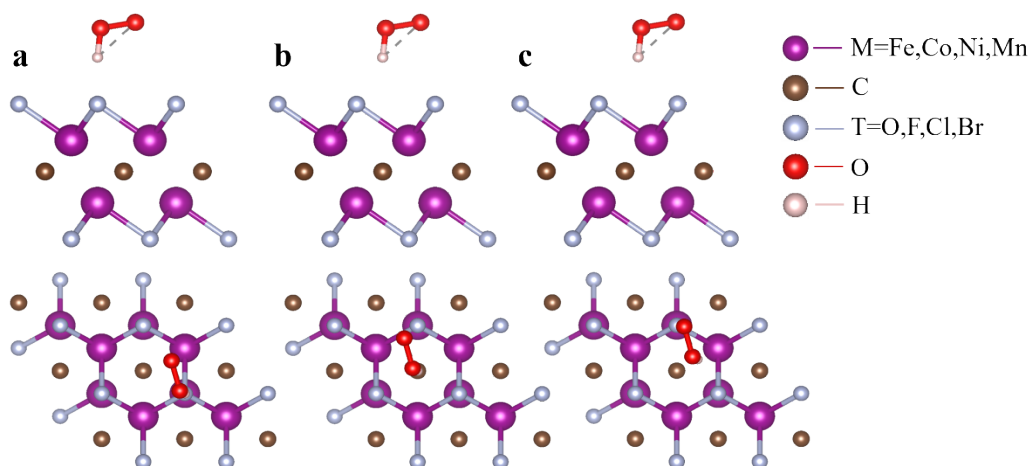

**Figure S3** Schematic diagram of HO<sub>2</sub>· adsorption: a-Top b-Hollow c-Bridge.

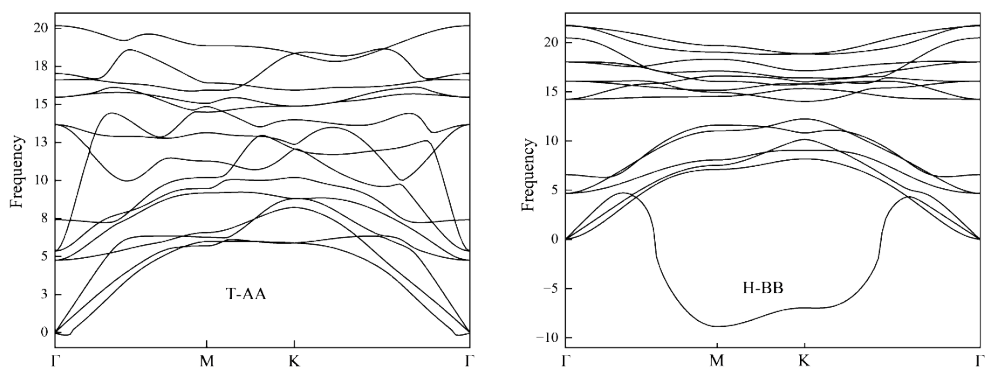

**Figure S4** Thermodynamic stability calculation results for different configurations of  $\text{Mn}_2\text{CO}_2$ .

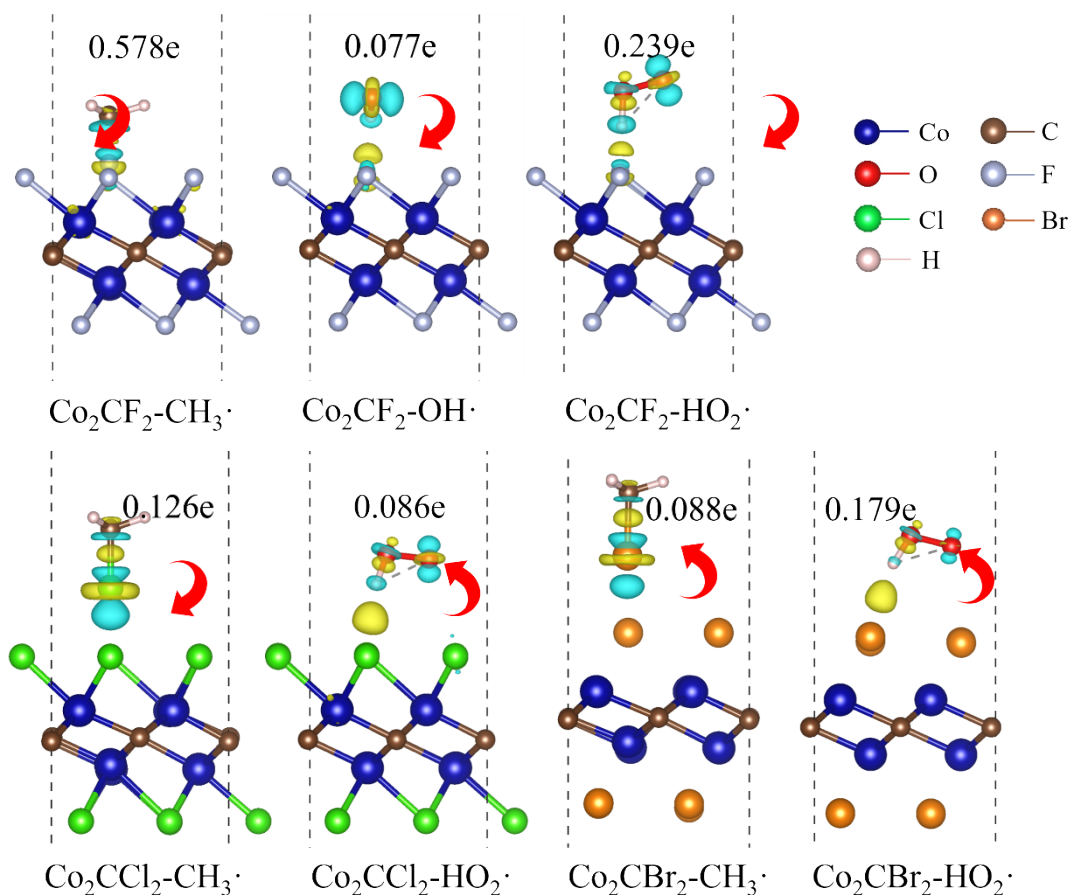

**Figure S5** The charge density difference of Co-based MXenes.

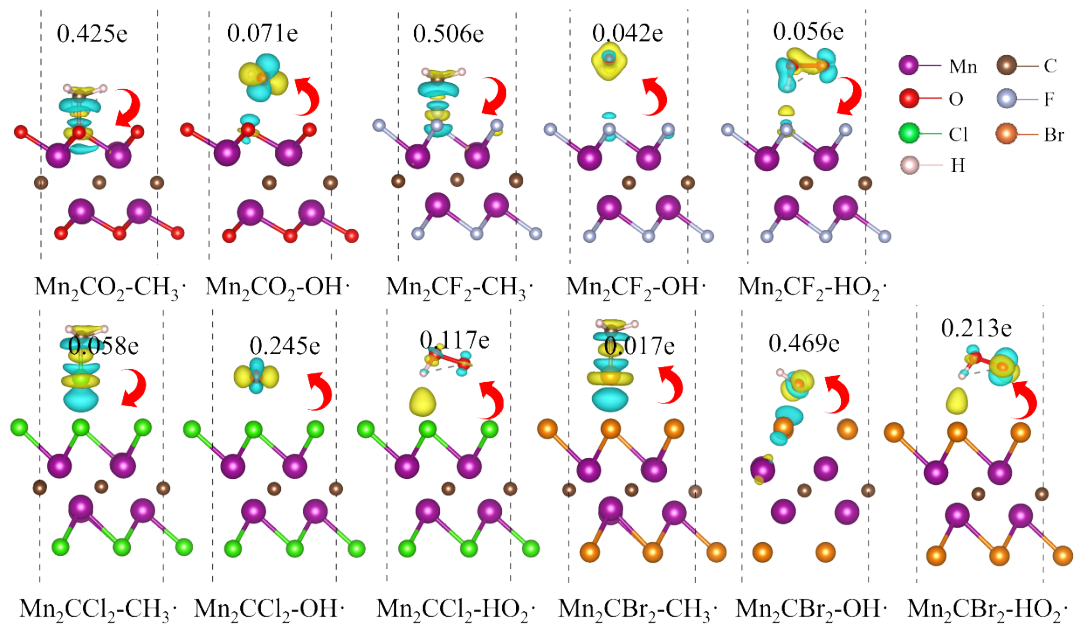

**Figure S6** The charge density difference of Mn-based MXenes.

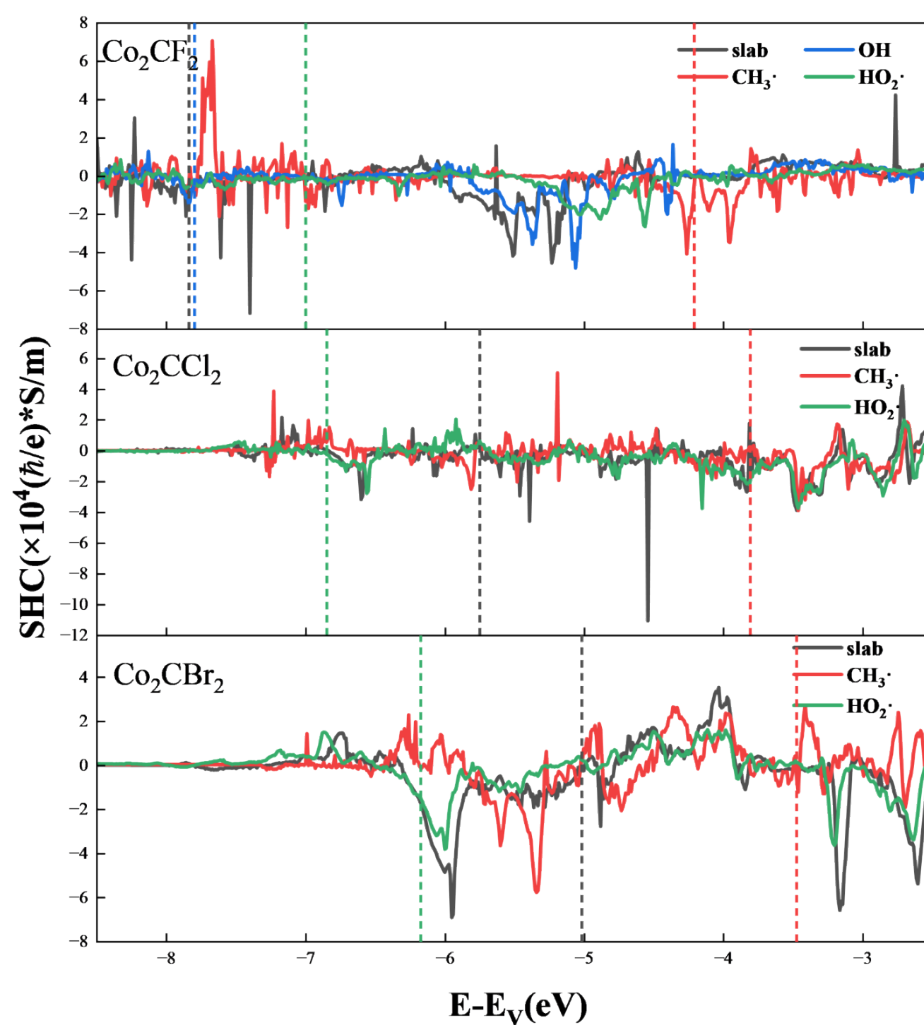

**Figure S7** Variation of the SHC of Co-based MXenes as a function of energy ( $E - E_v$ ), with the vacuum level set to 0 eV.

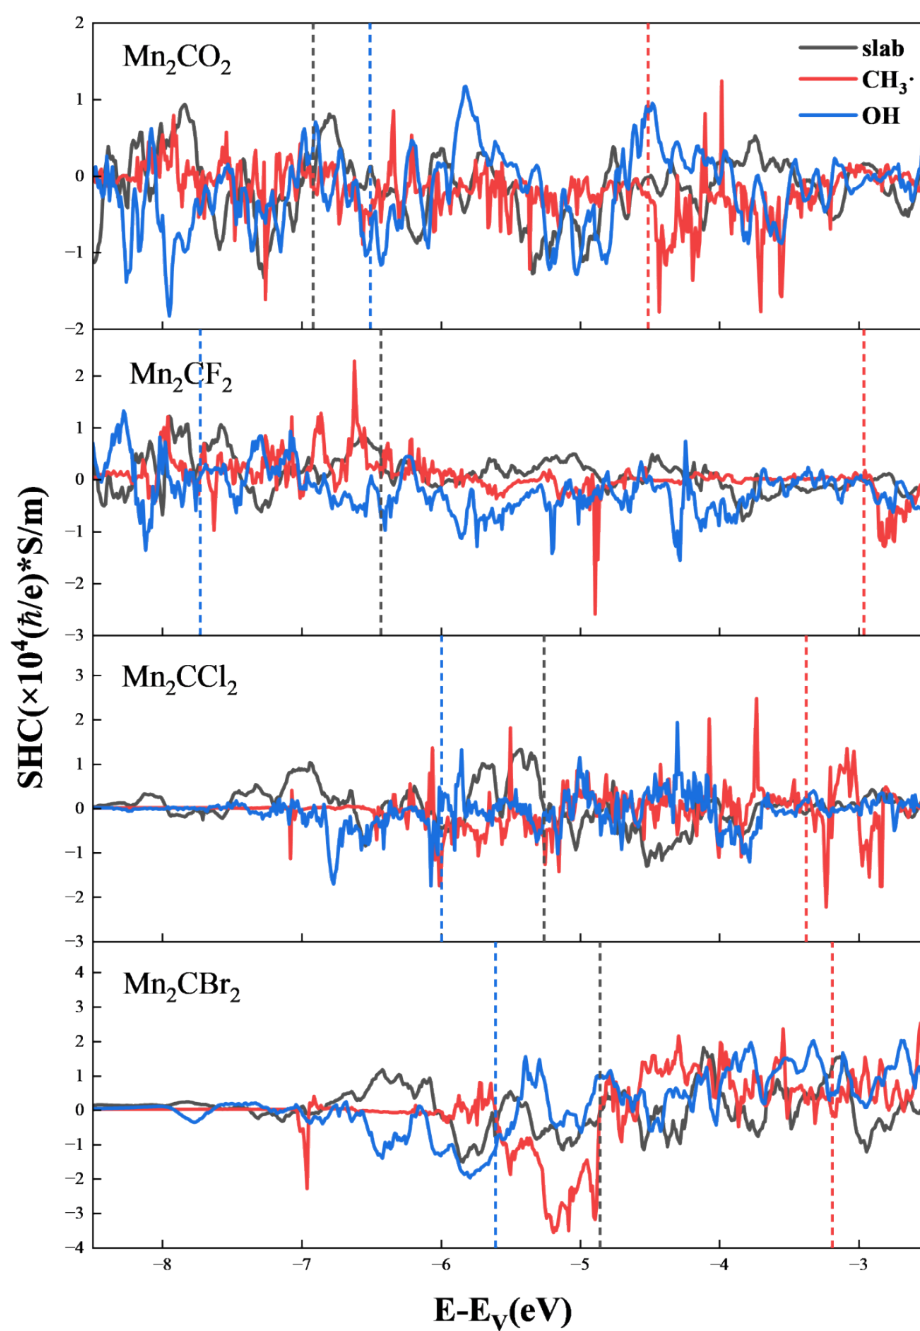

**Figure S8** Variation of the SHC of Mn-based MXenes as a function of energy ( $E - E_V$ ), with the vacuum level set to 0 eV.
